# Supplementary material for: Are drivers of northern lights in the ionosphere?
Source: Copernicus journal article supplement (doi:10.5194/angeo-2023-32), 2023-11-13

Figure A

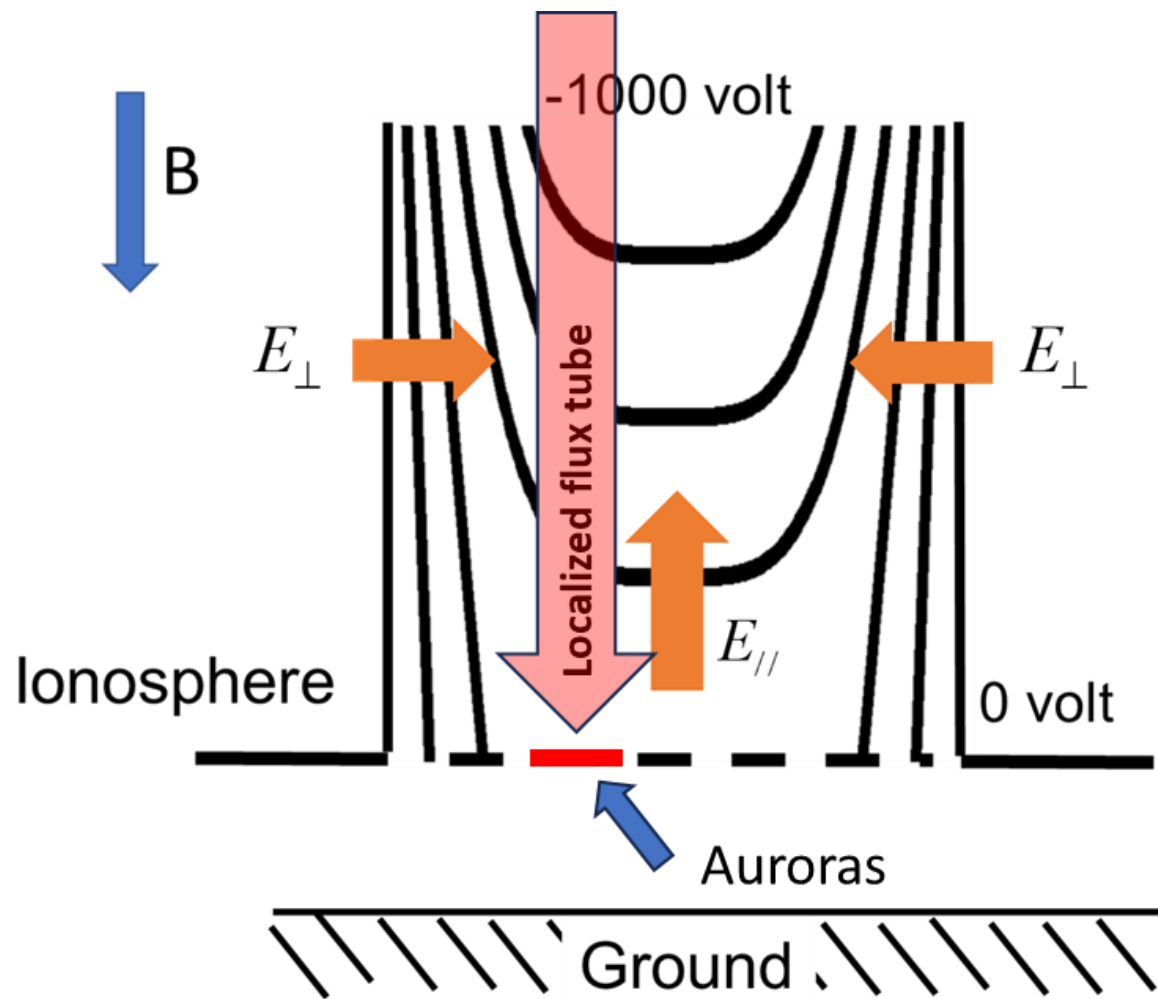

Figure B

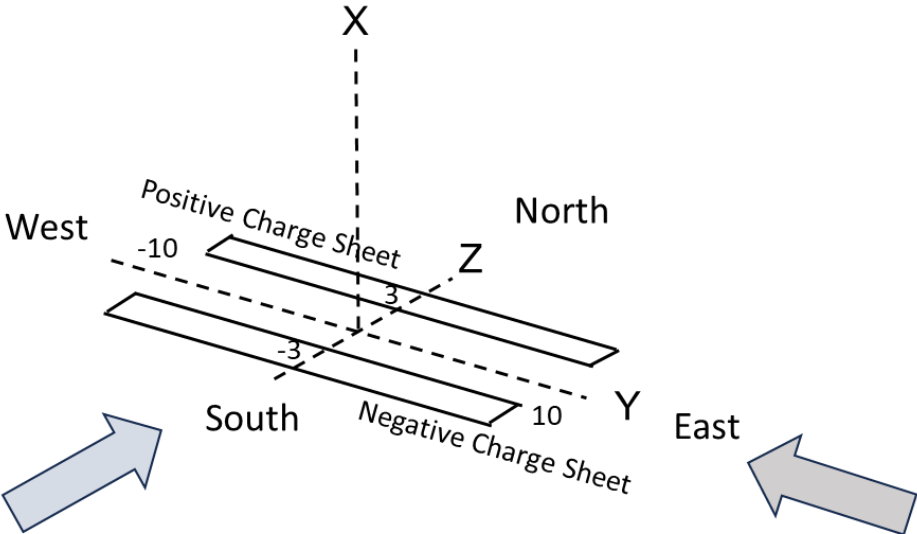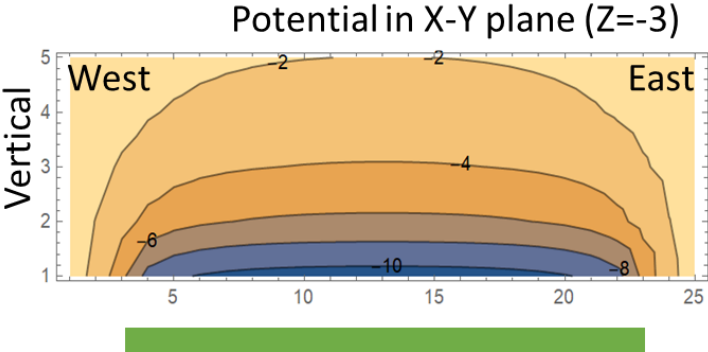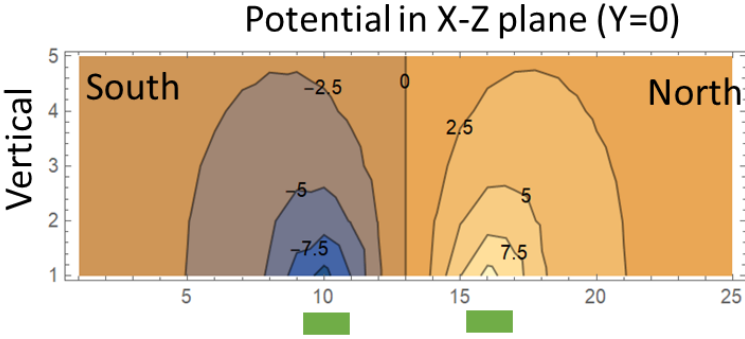

Figure C

- : average space charge of electrons
- : average space charge of ions

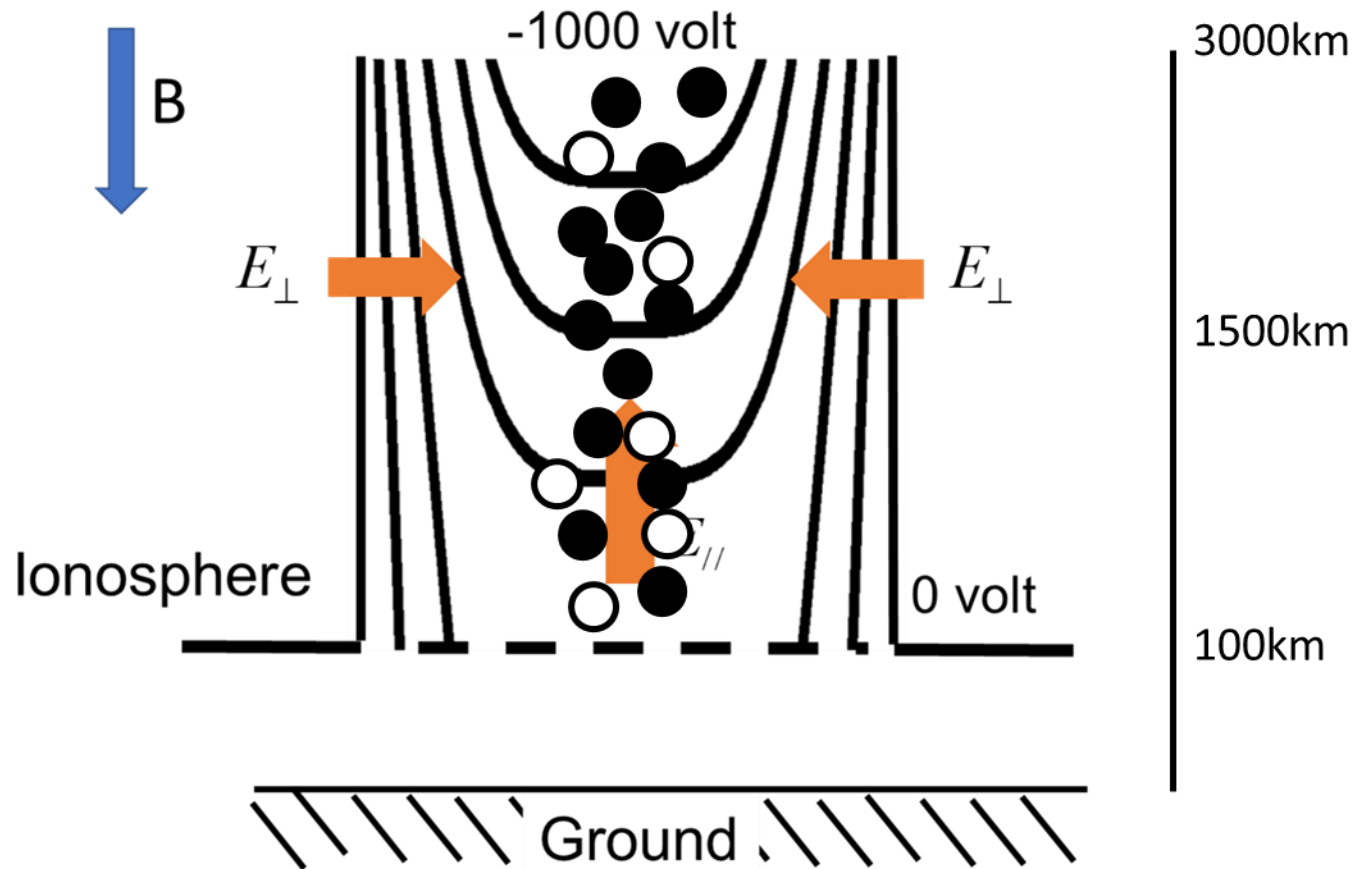

Figure D

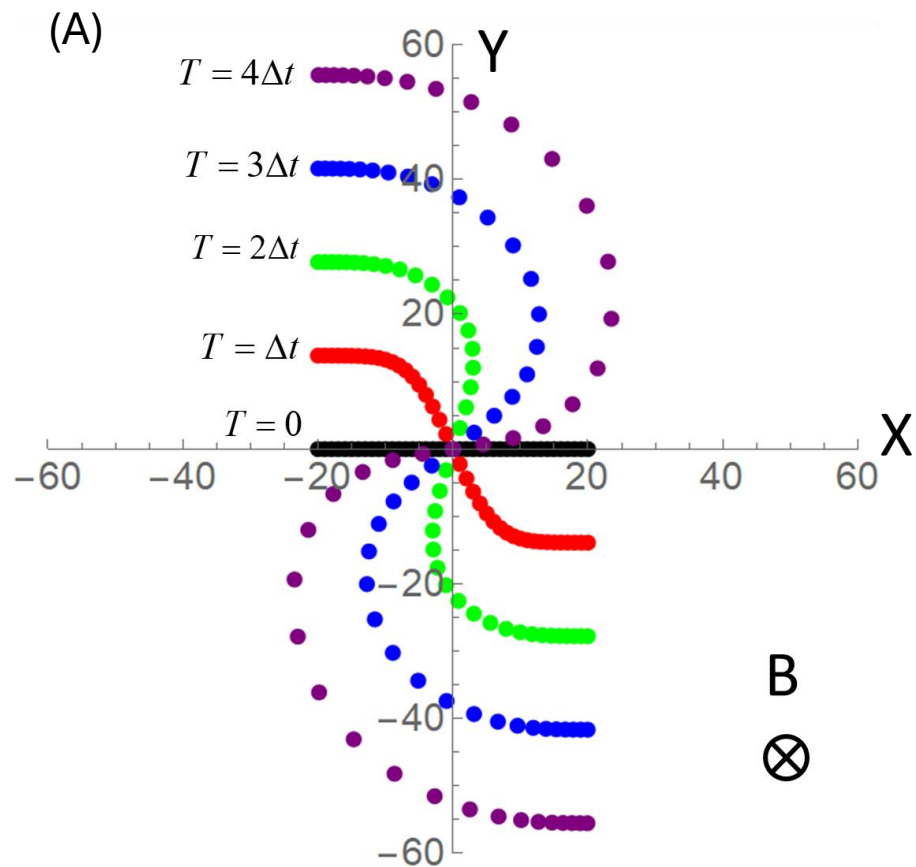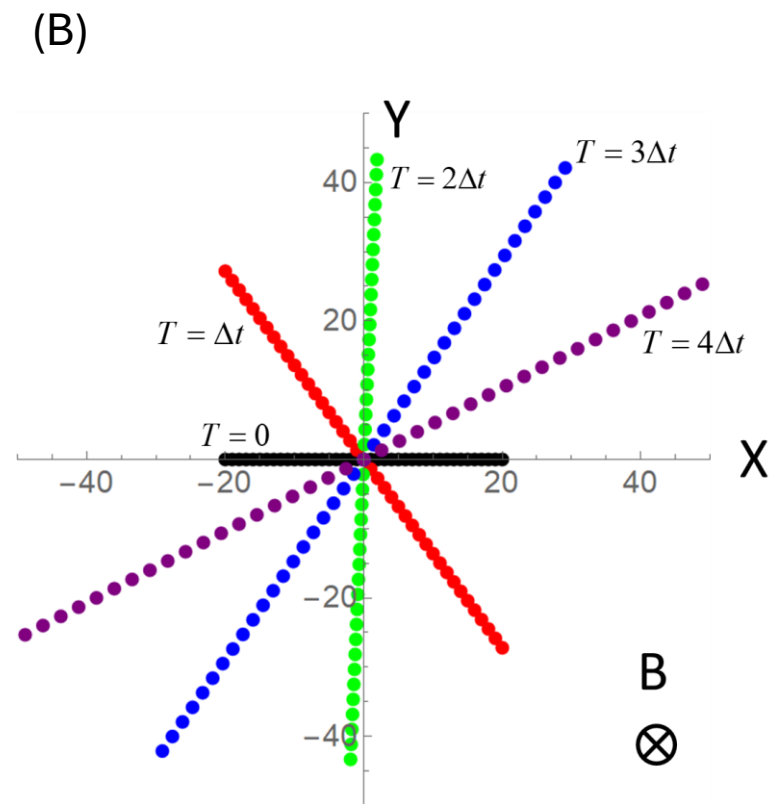

Supplement: Supplementary file [file angeo-2023-32-AC2-supplement.pdf]
